# Supplementary material for: Nanoemulsions of Jasminum humile L. and Jasminum grandiflorum L. Essential Oils: An Approach to Enhance Their Cytotoxic and Antiviral Effects
Source: MDPI journal article supplement (doi:10.3390/molecules27113639), 2022-06-06
Supplement: s1 [file s1]

**Nanoemulsions of *Jasminum humile* L. and *Jasminum grandiflorum* L.  
essential oils: an approach to enhance their cytotoxic and antiviral effects**

Khaled Ahmed Mansour<sup>a, b</sup>, Mona El-Neketi<sup>a, \*</sup>, Mohamed-Farid Lahloub<sup>a</sup>,  
Ahmed Elbermawi<sup>a, \*</sup>

<sup>a</sup> Department of Pharmacognosy, Faculty of Pharmacy, Mansoura University,  
35516 Mansoura, Egypt

<sup>b</sup> Department of Pharmacognosy, Faculty of Pharmacy, Horus University in  
Egypt, 34517 New Damietta, Egypt

E-mail address: Khaled.mansour@o6u.edu.eg; Khali@horus.edu.eg (K.A.  
Mansour)

E-mail address: melneketi@mans.edu.eg (M. El-Neketi),  
monaneketi@gmail.com

E-mail address: mfil@mans.edu.eg (M.F. Lahloub)

E-mail address: Asbeder@mans.edu.eg (A. Elbermawi)

\*Corresponding author at: Department of Pharmacognosy, Faculty of Pharmacy,  
Mansoura University, 35516 Mansoura, Egypt

Telephone:

+20-011-57-557-280

E-mail address: melneketi@mans.edu.eg (M. El-Neketi)

+20-010-04-811-533

E-mail address: Asbeder@mans.edu.eg (A. Elbermawi)

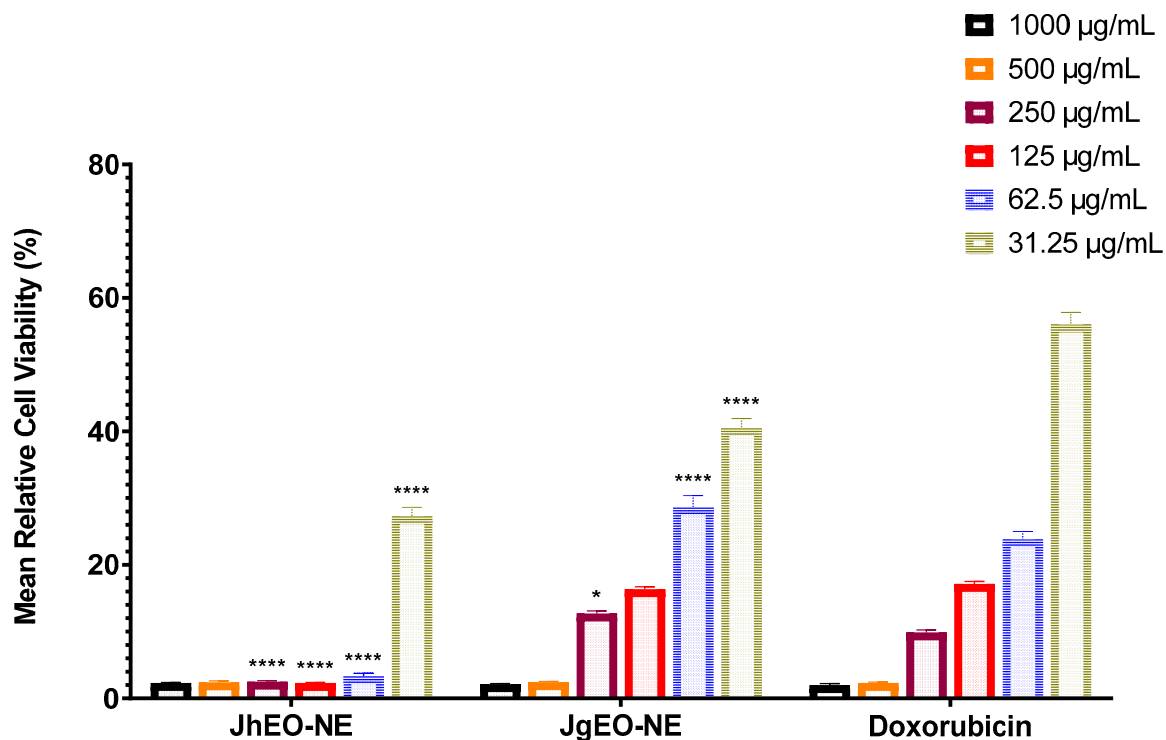

**Figure S1.** Cytotoxic activity of various concentrations the nanoemulsion formulations of the essential oils obtained from *Jasminum humile* L. (JhEO-NE) and *Jasminum grandiflorum* L. (JgEO-NE) as well as standard doxorubicin against the leukemia cell line, HepG-2. Bar graphs represent the mean  $\pm$  SEM of 3 determinations. Asterisks show statistical significance ( $p \leq 0.05$ ) compared to the reference drug doxorubicin. (\*) denotes  $p \leq 0.05$ . (\*\*) denotes  $p \leq 0.01$ . (\*\*\*) denotes  $p \leq 0.001$ . (\*\*\*\*) denotes  $p \leq 0.0001$ .

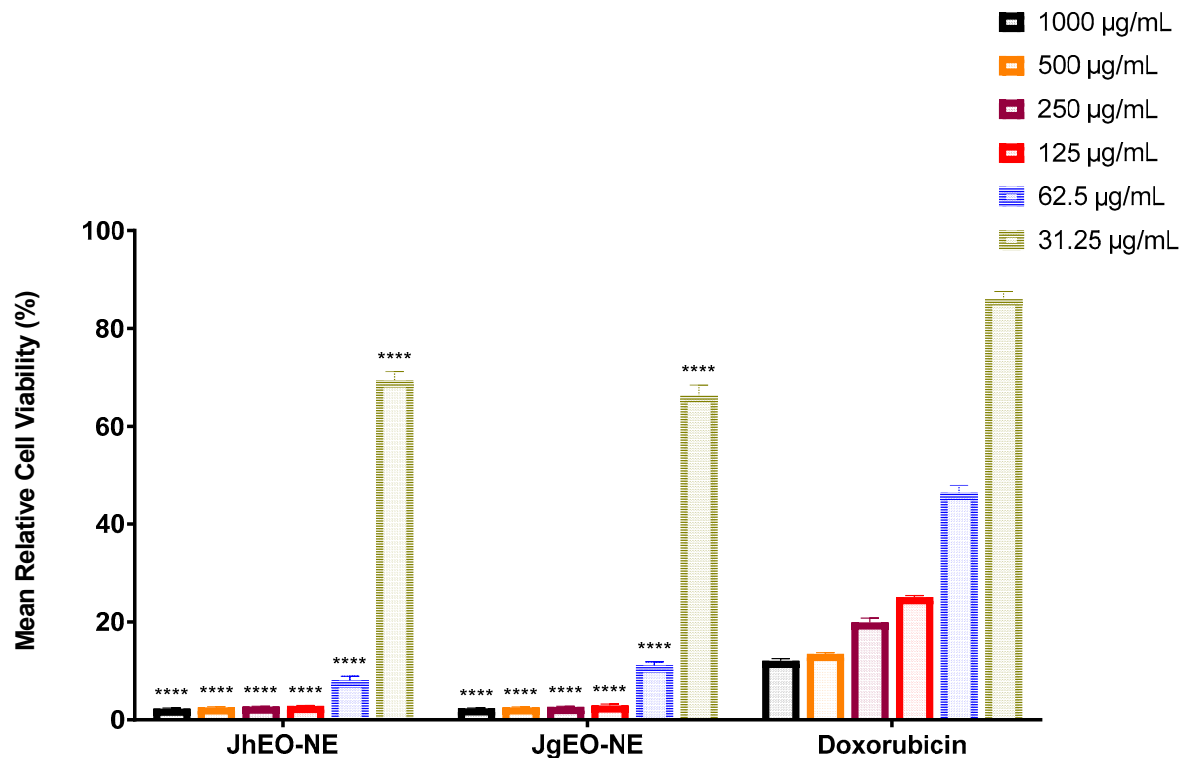

**Figure S2.** Cytotoxic activity of various concentrations of the nanoemulsion formulations of the essential oils obtained from *Jasminum humile* L. (JhEO-NE) and *Jasminum grandiflorum* L. (JgEO-NE) as well as standard doxorubicin against the leukemia cell line, MCF-7. Bar graphs represent the mean  $\pm$  SEM of 3 determinations. Asterisks show statistical significance ( $p \leq 0.05$ ) compared to the reference drug doxorubicin. (\*) denotes  $p \leq 0.05$ . (\*\*) denotes  $p \leq 0.01$ . (\*\*\*) denotes  $p \leq 0.001$ . (\*\*\*\*) denotes  $p \leq 0.0001$ .

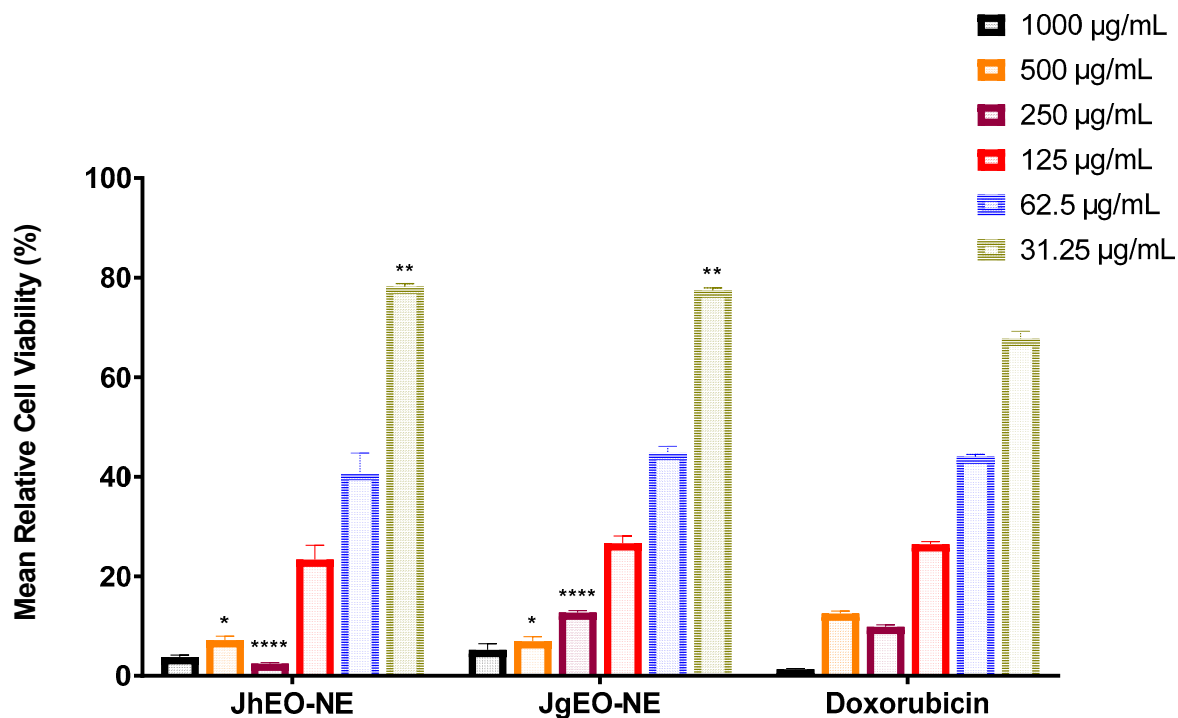

**Figure S3.** Cytotoxic activity of various concentrations of the nanoemulsion formulations of the essential oils obtained from *Jasminum humile* L. (JhEO-NE) and *Jasminum grandiflorum* L. (JgEO-NE) as well as standard doxorubicin against the leukemia cell line, THP-1. Bar graphs represent the mean  $\pm$  SEM of 3 determinations. Asterisks show statistical significance ( $p \leq 0.05$ ) compared to the reference drug doxorubicin. (\*) denotes  $p \leq 0.05$ . (\*\*) denotes  $p \leq 0.01$ . (\*\*\*) denotes  $p \leq 0.001$ . (\*\*\*\*) denotes  $p \leq 0.0001$ .

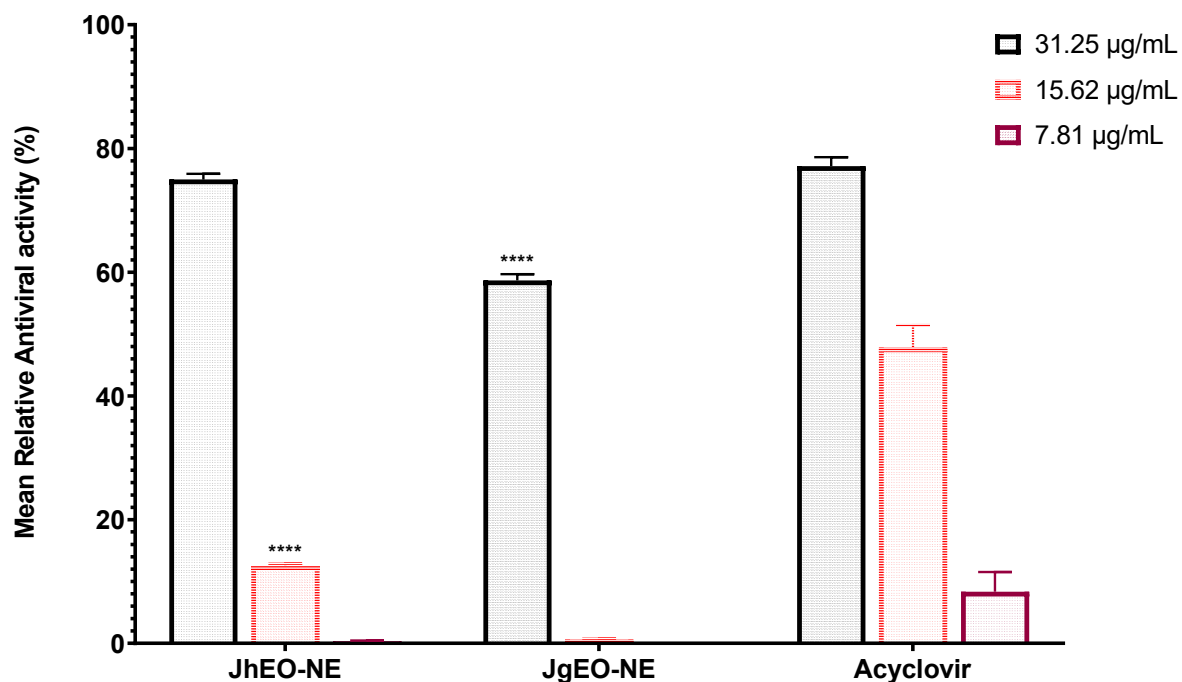

**Figure S4.** Antiviral activity of various concentrations of the nanoemulsion formulations of the essential oils obtained from *Jasminum humile* L. (JhEO-NE) and *Jasminum grandiflorum* L. (JgEO-NE) as well as standard doxorubicin against HAV virus. Bar graphs represent the mean  $\pm$  SEM of 3 determinations. Asterisks show statistical significance ( $p \leq 0.05$ ) compared to the reference drug doxorubicin. (\*) denotes  $p \leq 0.05$ . (\*\*) denotes  $p \leq 0.01$ . (\*\*\*) denotes  $p \leq 0.001$ . (\*\*\*\*) denotes  $p \leq 0.0001$ .

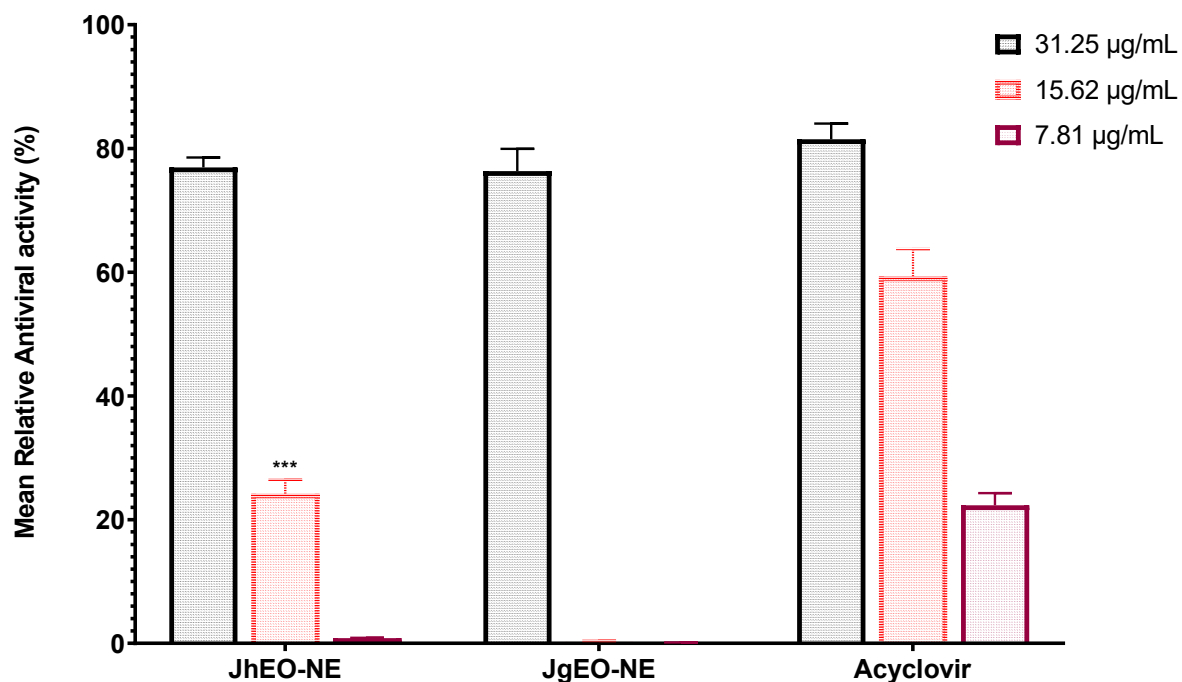

**Figure S5.** Antiviral activity of various concentrations of the nanoemulsion formulations of the essential oils obtained from *Jasminum humile* L. (JhEO-NE) and *Jasminum grandiflorum* L. (JgEO-NE) as well as standard doxorubicin against HSV-1 virus. Bar graphs represent the mean  $\pm$  SEM of 3 determinations. Asterisks show statistical significance ( $p \leq 0.05$ ) compared to the reference drug doxorubicin. (\*) denotes  $p \leq 0.05$ . (\*\*) denotes  $p \leq 0.01$ . (\*\*\*) denotes  $p \leq 0.001$ . (\*\*\*\*) denotes  $p \leq 0.0001$ .
